# Supplementary material for: School staff perpetration of physical violence against students in Uganda: a multilevel analysis of risk factors
Source: PubMed Central journal article supplement — BMJ Open. 2017 Aug 18;7(8):e015567. doi: 10.1136/bmjopen-2016-015567 (PMC5724111; doi:10.1136/bmjopen-2016-015567), 2017-08-18
Supplement: bmjopen-2016-015567supp001.pdf [file bmjopen-2016-015567supp001.pdf]

## Supplementary Appendices. School Staff Perpetration of Physical Violence against Students in Uganda: A Multilevel Analysis of Risk Factors

### Appendix 1. Definition of Outcome Variable: School Staff Physical Violence Perpetration against Student in the Past Week in Luwero District, Uganda\*

What are the methods of physical discipline you have used with students in the past week? Have you done the following:

- Slapped them with a hand on their face or head as punishment?
- Twisted their ear as punishment?
- Twisted their arm as punishment?
- Pulled their hair as punishment?
- Hit them by throwing an object at them?
- Hit them with a closed fist?
- Hit them with a stick?
- Caned them?
- Kicked them?
- Knocked them on the head as punishment?
- Made them dig, slash a field, or do other labor as punishment?
- Hit their fingers or hands with an object as punishment?
- Crushed their fingers or hands as punishment?
- Made them stand or kneel in a way that hurts to punish them?
- Made them stay outside, for example, in the heat or rain to punish them?
- Burn them as punishment?
- Taken away their food as punishment?
- Forced them to do something that was dangerous?
- Choked them?
- Tied them up (with a rope or belt) at school?
- Tried to cut them purposefully with a sharp object?
- Made them roll over on the ground until they were dizzy as punishment?

\*Staff coded as having the outcome if answering "yes" to any of the 22 items listed.

**Appendix 2.** Composite measures generated to measure attitudes and social norms in assessing predictors for staff physical violence perpetration against students in the past week; Luwero District, Uganda

| Scale                                                                                                                                                                                                                                                             | Statements                                                                                                                                                                                                                                                                                                                                                                                                                                                                                                                                                                                                                                                                                                                                                                                                                                                                                                                                                                                                                                                                                                                                                                                                                                                                                                                                                                                                                                                                                                                                         | Response Options                                                                                                                 | Notes                                                                                                                                                                                                                                                                                                                                                                                                                                                                                                                                                                                                                                                                                                                                                         |
|-------------------------------------------------------------------------------------------------------------------------------------------------------------------------------------------------------------------------------------------------------------------|----------------------------------------------------------------------------------------------------------------------------------------------------------------------------------------------------------------------------------------------------------------------------------------------------------------------------------------------------------------------------------------------------------------------------------------------------------------------------------------------------------------------------------------------------------------------------------------------------------------------------------------------------------------------------------------------------------------------------------------------------------------------------------------------------------------------------------------------------------------------------------------------------------------------------------------------------------------------------------------------------------------------------------------------------------------------------------------------------------------------------------------------------------------------------------------------------------------------------------------------------------------------------------------------------------------------------------------------------------------------------------------------------------------------------------------------------------------------------------------------------------------------------------------------------|----------------------------------------------------------------------------------------------------------------------------------|---------------------------------------------------------------------------------------------------------------------------------------------------------------------------------------------------------------------------------------------------------------------------------------------------------------------------------------------------------------------------------------------------------------------------------------------------------------------------------------------------------------------------------------------------------------------------------------------------------------------------------------------------------------------------------------------------------------------------------------------------------------|
| <p><b>Personal acceptance of physical discipline</b><br/>                     •6 items<br/>                     •Cronbach's alpha: 0.75<br/>                     •Interitem correlation: 0.319-0.371<br/>                     (mean: 0.351)</p>                   | <ul style="list-style-type: none"> <li>•Physical discipline of students by teachers is normal.</li> <li>•Students who misbehave should be physically disciplined.</li> <li>•Sometimes teachers must hit students to make them listen.</li> <li>•Sometimes teachers must hit students to make them learn.</li> <li>•Sometimes physically disciplining students is the only way to make them respect you.</li> <li>•In your opinion, is it OK to physically discipline children when they misbehave?</li> </ul>                                                                                                                                                                                                                                                                                                                                                                                                                                                                                                                                                                                                                                                                                                                                                                                                                                                                                                                                                                                                                                      | <ul style="list-style-type: none"> <li>•Strongly agree</li> <li>•Agree</li> <li>•Disagree</li> <li>•Strongly disagree</li> </ul> | <ul style="list-style-type: none"> <li>•Data derived from school staff surveys (n=499).</li> <li>•Score range= 0-18. Scores were summed and grouped in thirds to represent low, medium, and high acceptance of physical discipline.</li> <li>•In addition to being analysed at the individual level, items were aggregated and a mean score was derived for each school. These scores were then grouped in thirds to approximate social norms accepting of physical discipline at the school level.</li> </ul>                                                                                                                                                                                                                                                |
| <p><b>Perceived quality of school climate</b><br/>                     •16 items<br/>                     •Cronbach's alpha: 0.75<br/>                     •Interitem correlation: 0.153-0.175<br/>                     (mean: 0.160)</p>                         | <ul style="list-style-type: none"> <li>•In your opinion, do you have enough opportunities to say what you think and contribute to how the school is run?</li> <li>•Do students in your school have an opportunity to say what they think?</li> <li>•Do students in your school have an opportunity to contribute to how the school is run?</li> <li>•Do you feel that your views on how the school's policies could be improved are welcomed?</li> <li>•How often do you take any actions to change how your school is run?</li> <li>•Do you feel that there is anybody at your school you can talk to if you feel unhappy about work?</li> <li>•Thinking about your school as a whole, do you feel like you are part of a team?</li> <li>•Do you have regular staff meetings?</li> <li>•Would you say that students feel comfortable talking to you/want to confide in you if they are unhappy about something at home or at school?</li> <li>•Do you feel that students respect their peers and adults?</li> <li>•Do you feel that school staff respect their students?</li> <li>•Do you have a good relationship with the students?</li> <li>•Do you have a good relationship with parents?</li> <li>•Do you feel concerned about how other school staff members behave at school? (reverse coded)</li> <li>•How often does this school experience problems with physical violence? (reverse coded)</li> <li>•How often does this school experience problems with bullying (e.g. verbal abuse of staff or students)? (reverse coded)</li> </ul> | <ul style="list-style-type: none"> <li>•All the time</li> <li>•Most of the time</li> <li>•Sometimes</li> <li>•Never</li> </ul>   | <ul style="list-style-type: none"> <li>•Data derived from school staff surveys (n=499).</li> <li>•Score range= 0-48. Scores were summed and grouped into thirds as high, medium, and low perceived quality of school climate.</li> <li>•Items were selected with reference to existing school climate scales: School Climate Survey (57), Charles F. Kettering Ltd. School Climate Profile (58), California School Climate and Survey-Short Form (59), and the SRS Safe Schools Survey (60).</li> <li>•In addition to being analysed at the individual level, items were aggregated and a mean score was derived for each school. These scores were then grouped in thirds to approximate perceived quality of school climate at the school level.</li> </ul> |
| <p><b>Job satisfaction</b><br/>                     •5 items<br/>                     •Cronbach's alpha: 0.65<br/>                     •Interitem correlation: 0.223-0.288<br/>                     (mean: 0.245)</p>                                             | <ul style="list-style-type: none"> <li>•How often would you say that you enjoy your job?</li> <li>•Do you feel valued as an employee?</li> <li>•Do you take pride in your work?</li> <li>•Do you feel that your employers care about your wellbeing?</li> <li>•Do you feel adequately rewarded financially for what you do?</li> </ul>                                                                                                                                                                                                                                                                                                                                                                                                                                                                                                                                                                                                                                                                                                                                                                                                                                                                                                                                                                                                                                                                                                                                                                                                             | <ul style="list-style-type: none"> <li>•All the time</li> <li>•Most of the time</li> <li>•Sometimes</li> <li>•Never</li> </ul>   | <ul style="list-style-type: none"> <li>•Data derived from school staff surveys (n=499).</li> <li>•Score range= 0-15. Scores were summed and grouped in thirds to represent high, medium, and low job satisfaction.</li> </ul>                                                                                                                                                                                                                                                                                                                                                                                                                                                                                                                                 |
| <p><b>Social norms accepting of physical discipline in communities</b><br/>                     •7 items<br/>                     •Cronbach's alpha: 0.86<br/>                     •Interitem correlation: 0.459-0.497<br/>                     (mean: 0.475)</p> | <ul style="list-style-type: none"> <li>•Students who misbehave should be physically disciplined.</li> <li>•Sometimes teachers must hit students to make them listen.</li> <li>•Sometimes teachers must hit students to make them learn.</li> <li>•Children who misbehave should be physically disciplined.</li> <li>•Sometimes parents must hit students to make them listen.</li> <li>•Sometimes parents must hit children to make them learn.</li> <li>•Sometimes physically disciplining children is the only way to make them respect you.</li> </ul>                                                                                                                                                                                                                                                                                                                                                                                                                                                                                                                                                                                                                                                                                                                                                                                                                                                                                                                                                                                          | <ul style="list-style-type: none"> <li>•Strongly agree</li> <li>•Agree</li> <li>•Disagree</li> <li>•Strongly disagree</li> </ul> | <ul style="list-style-type: none"> <li>•Data derived from caregiver surveys (n=828).</li> <li>•Score range= 0-21. Scores were summed and a mean score was derived for each school. These scores were then grouped in thirds to approximate social norms accepting of physical discipline within communities surrounding schools.</li> </ul>                                                                                                                                                                                                                                                                                                                                                                                                                   |

**Appendix 3.** Index generated to measure socio-economic status of students' families in assessing predictors for staff physical violence perpetration against students in the past week; Luwero District, Uganda

| Statements (n=14)                                                                                               | Response Options                                                         |
|-----------------------------------------------------------------------------------------------------------------|--------------------------------------------------------------------------|
| •Do you own or rent a property, live somewhere without paying or does your employer pay for your accommodation? | Owns; rents; other                                                       |
| •How many adults aged 18 years and older sleep in the same sleeping area with you? (n=746)                      | 0; 1+                                                                    |
| •Yesterday, how many meals did you eat? (n=827)                                                                 | 1 meal; 2 meals; 3 meals; other                                          |
| •Thinking about your house where you live now, what is the main material of the floor? (n=803)                  | Earth/sand; cement; other                                                |
| •Thinking about your house where you live now, what is the main material of the roof?                           | Thatch/palm leaf; metal; calamine/cement; fibre; roofing shingles; other |
| •Does your household have...electricity? (n=824)                                                                | No; yes                                                                  |
| •Does your household have...a radio?                                                                            |                                                                          |
| •Does your household have...a television?                                                                       |                                                                          |
| •Does any member of your household have...a watch?                                                              |                                                                          |
| •Does any member of your household have...a mobile phone?                                                       |                                                                          |
| •Does any member of your household have...a bicycle?                                                            |                                                                          |
| •Does any member of your household have...a motorcycle?                                                         |                                                                          |
| •Does any member of this household own land that can be used for agriculture?                                   |                                                                          |
| •Does any member of this household own any livestock, herds, other farm animals, or poultry?                    |                                                                          |

Notes: Generated using Principal Components Analysis; completed by 828 caregivers.
